# Supplementary material
Source: Springer Nature journal article supplement (https://www.springermedizin.de/resource/supplementary/13049_2009_64_MOESM1_ESM.pdf/9665812)

# Clotting

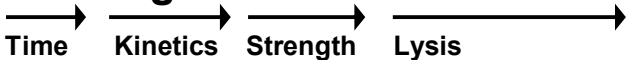

$\alpha$   
K

R  
CT

$\alpha$   
CFT

MA  
MCF

Ly  
CL

TEG

ROTEM

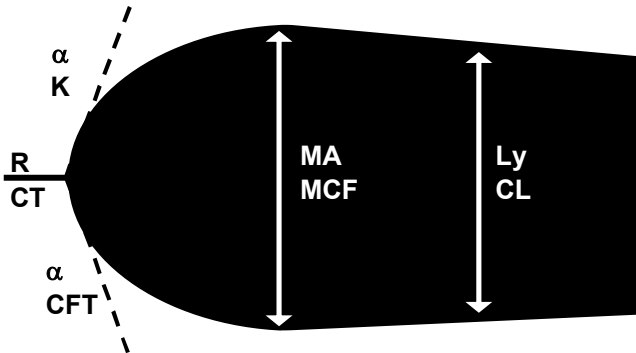

Supplement: MOESM1 [file 9665812]
